# Supplementary material for: BCLAF1 is a radiation-induced H2AX-interacting partner involved in γH2AX-mediated regulation of apoptosis and DNA repair
Source: PubMed Central journal article supplement — Cell Death Dis. 2012 Jul 26;3(7):e359–. doi: 10.1038/cddis.2012.76 (PMC3406578; doi:10.1038/cddis.2012.76), 2012-07-26
Supplement: cddis201276x1.pdf [file cddis201276x1.pdf]

## Supplementary information

**Figure S1** IR-induced dose-dependent changes of the phosphorylation of FLAG-H2AX in the stable cells. **(A)** 293T cells stably expressing FLAG-tagged H2AX (FLAG-H2AX cells) were irradiated at the indicated dose, lysed (1h after the radiation), and the lysates were analyzed by immunoblotting (IB). IB was done first with anti-FLAG antibody and then the same PVDF membrane was re-probed with anti- $\gamma$ H2AX antibody. The bands near 26 kDa indicated FLAG-tagged H2AX which presented at a constant level and served as the loading control. The level of phosphorylated FLAG-H2AX increased in an IR dose-dependent manner. **(B)** MS spectra of AACT-containing peptides of the representative proteins identified in the IP mixture. Peptide sequences are, ND LAVVDVR (Nucleolin), KELAAQLNEEAKR (Spt16), ILQDSLGGGR (KIF11), MSVQPTVSLGGFEITPPVVL (NPM1), LDQQTLPLGGR (RBM10) and TTNFAGILSQGLR (PARP1). The IR-induced dose-dependent binding to H2AX was quantified based on the isotope ratio of particular arginine-containing peptides. **(C)** Immunoblot validation of these dose-dependent H2AX interactions identified based on quantitative MS data. The FLAG-H2AX immunoprecipitates isolated from either non-irradiated or irradiated cells were subjected to immunoblotting with the indicated antibodies. As a loading control the amount of H2AX was measured by blotting against anti-FLAG antibodies. (\* indicates the signals cross-reactive with light chain immunoglobulin). Lane 1 to 3, Input; lane 4 to 6, empty vector-purified control; lane 7, 9 and 11, mock-purified control; lane 8, 10 and 12, dose-dependent H2AX-associating proteins.

**Figure S2** Domain analysis of H2AX interactome identified by MS-based quantitative proteomics. **(A)** A two-dimensional hierarchical clustering map was constructed by TreeView programming where individual modular domains were arrayed in the vertical axis, and

individual proteins found to contain the closely related sets of modular domains were clustered in a phylogenetic manner along the horizontal axis. Four prominent clusters are indicated by green, white, yellow, and blue boxes. The ‘zoom-in’ clusters are shown in (B), (C), (D), and (E), with the protein/domain identities (see Experimental Procedures for details). All proteins shown in Fig. S2 and Table S3 were identified by using the criteria described in the Experimental Procedures (*Mass spectrometry*) and quantified based on the Experimental Procedures (*AACT-based quantitation for distinguishing dose-dependent H2AX interactors*). A total of 69 proteins were identified with high confidence. Among them, 18 proteins showed the IR-induced changes in their interactions with H2AX. In the hierarchal clustering map, we identified four prominent clusters in the green, yellow, white and blue box respectively (Fig. S2). As shown in Fig. S2B (green box), a common feature of these proteins is that all contains WD40 domain, which linked the neighboring phylogenetic trees to a variety of the functions ranging from signal transduction, transcription regulation, cell cycle control, to protein modification. Also some of our identified H2AX-interacting proteins were found containing characteristic domains such as chromo (SMRC1), PHD (JHDM3A and BPTF), Tudor (JHDM3A), bromo (BPTF), WD40 (BUB3, RACK1, MEP50, EIF3I and GNB2L1), and BRCT (PARP1) which are known to involve in the regulations of chromatin structure, post-translational modification on histones, cell cycle checkpoint functions response to DNA damage and apoptosis. Through identification of their containing of Ku, SAP and DNA Toposo IV domains which are known as the DNA/RNA binding domains, those proteins in yellow and white clusters (Fig. S2C and D) are grouped in the function associating with DNA repair and rejoining of DNA ends. The proteins in the blue cluster all containing contractile domains such as AAA and RRM domain (Fig. S2E) were found to link with diverse functions. For example, RBM10, HNRNPA1, EIF4B, and PABP1 are involved in the regulatory processes of mRNA metabolism whereas NUBP1, Nucleolin, and HNRNPCL1 play critical

roles in nucleosome assembly. This hierarchical clustering allowed for a systematic categorization of H2AX-interacting proteins into the corresponding function subsets and then identified those linked biological processes.

**Figure S3** The functional networks in the IR inducible H2AX interactome. The IR-inducible H2AX interaction network was mapped based on our identified  $\gamma$ H2AX interactors by using STRING, which contains both known and predicted protein-protein interactions indicative of those physical (direct) and functional (indirect) associations. The dose-dependent associations with H2AX (Table S2) were indicated by colors with proteins in pink box being those more associated with H2AX at both dose levels of 7.5 cGy and 10 Gy. The low dose (7.5 cGy)-sensitive associations are in lime green box and the high dose (10 Gy)-sensitive associations are in red box. The proteins in light blue box dissociate from H2AX upon radiation at both dose levels, and low dose-sensitive dissociations are in brown box. The proteins not identified by MS but found in known database are in gray box. Purple lines indicate those interactions identified by experiments, and light green lines suggest possible connectivity through data mining.

**Figure S4** The knock-down of BCLAF1 suppressed p53 expression. 293T cells were transfected with mock (lane 1), *BCLAF1* siRNA (40 nM; lane 2) or scrambled siRNA (40 nM; lane 3) respectively and then left for 2 days. Cell lysates were subjected to immunoblotting analysis with anti-BCLAF1 (upper panel), anti-p53 (middle panel) or anti-GAPDH (bottom panel).

**Figure S5** Effect of BCLAF1 knock-down on the growth and morphology of differentially irradiated A549 cells in higher magnification format. DAPI was used to stain DNA.

**Figure S6** Product ion spectrum of a phosphopeptide (SSSSRSSSPYSK) derived from MS/MS-collision-induced dissociation (CID) found in the BCLAF1 isolated from 10 Gy-irradiated *DNA-PKcs*<sup>+/-</sup> (top panel) and *DNA-PKcs*<sup>-/-</sup> (bottom panel) MEF cells. The upper inset in the top panel is an expanded view of product ions between *m/z* 520-660, and the lower one shows all major b- and y-type product ions assigned to the peptide sequence on the basis of dominant backbone fragment ions. Both Ser-151 and Tyr-150 were identified as phosphorylated sites.

**Figure S7** Label-free quantitation based on MS1 peak area of the phosphopeptide precursor ions of (SSSSRSSSPYSK) found in the BCLAF1 isolated from 10 Gy-irradiated *DNA-PKcs*<sup>-/-</sup> (top panel) and *DNA-PKcs*<sup>+/-</sup> (bottom panel) MEF cells. Note that the peak represents an isobaric mixture of phosphopeptides comprising phosphorylations at S151 and Y150. Total spectral counts of all the proteins found in each sample were used to normalize the total BCLAF1 protein levels found in both *DNA-PKcs*<sup>-/-</sup> and *DNA-PKcs*<sup>+/-</sup> MEF cells. The normalized spectral counts for BCLAF1 showed a ratio of 1 between *DNA-PKcs*<sup>-/-</sup> and *DNA-PKcs*<sup>+/-</sup>. In addition, the basal phosphorylation levels of BCLAF1 peptide SSSSRSSSPYSK in both *DNA-PKcs*<sup>-/-</sup> and *DNA-PKcs*<sup>+/-</sup> implicates phosphorylation at Y150 in BCLAF1 in addition to its phosphorylation at S151. The phosphorylation at Y150 has been reported (1) in BCLAF1 and our data suggests that its occupancy is independent of DNA-PKcs.

**Figure S8** Product ion spectrum corresponding to high energy collision dissociation (HCD) of doubly protonated SSSSRSSSPYSK-phosphopeptide sequence found in BCLAF1. The two possible phosphorylation sites are highlighted based on phosphospecific cleavages. Note that *m/z* 216 Da corresponds to phosphotyrosine immonium ions and is shown as **Im(pY)** and

another phosphoserine immonium ion is indicated as **Im(pS)**. This spectrum verified the possibility of an isobaric mixture of phosphopeptides comprising both S151 and Y150 phosphorylation. The corresponding phosphoimmonium reporter ions for both pS-151 and pY-150 supports that the wild-type *DNA-PKcs*<sup>+/-</sup> cells comprise phosphorylation at both sites in concordance with our label-free phosphopeptide quantitation results.

## Reference

1. Linding, R., Jensen, L. J., Ostheimer, G. J., van Vugt, M. A., Jørgensen, C., Miron, I. M., Diella, F., Colwill, K., Taylor, L., Elder, K., Metalnikov, P., Nguyen, V., Pasculescu, A., Jin, J., Park, J. G., Samson, L. D., Woodgett, J. R., Russell, Robert B., Bork, P., Yaffe, M. B., and Pawson, T. (2007) *Cell* **129**, 1415-1426

# Supplement Fig. 1

**A**

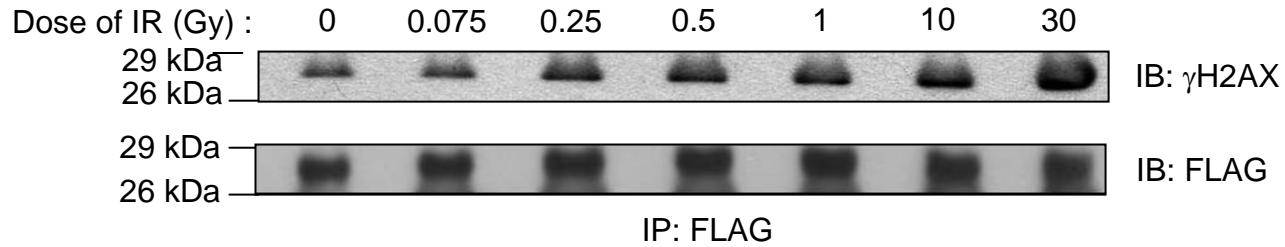

**B**

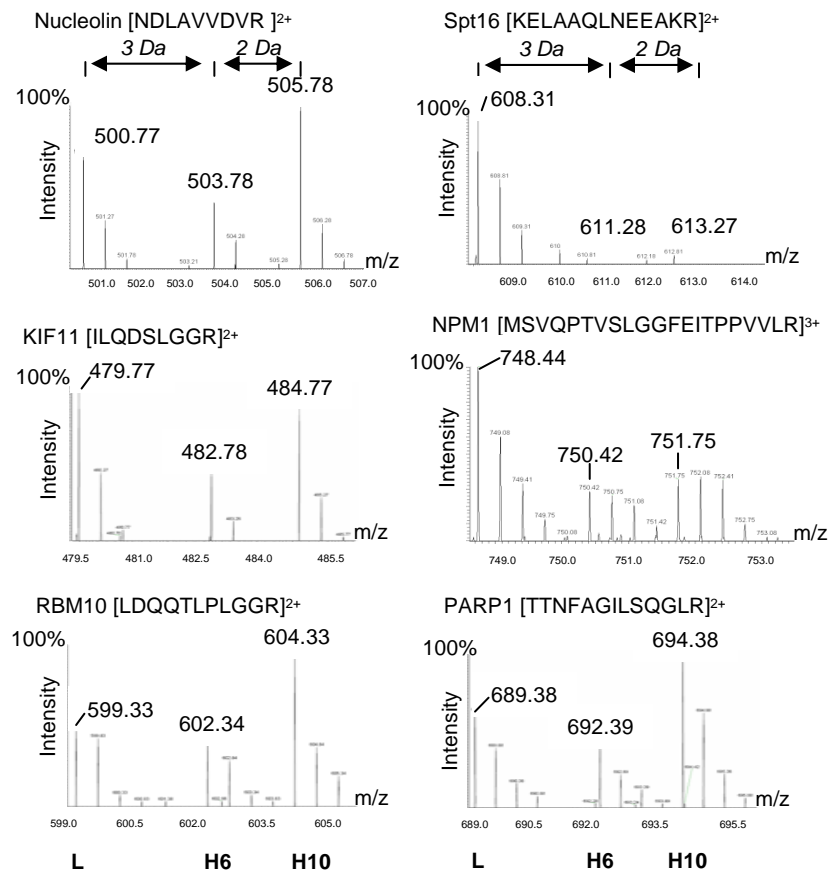

**C**

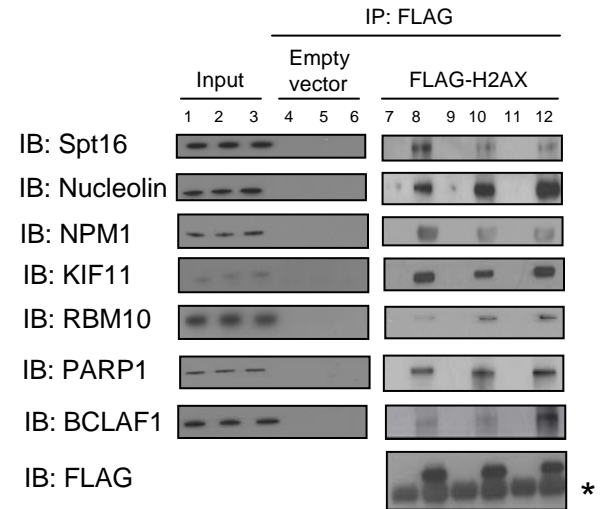

Supplement Fig. 2

Proteins

A

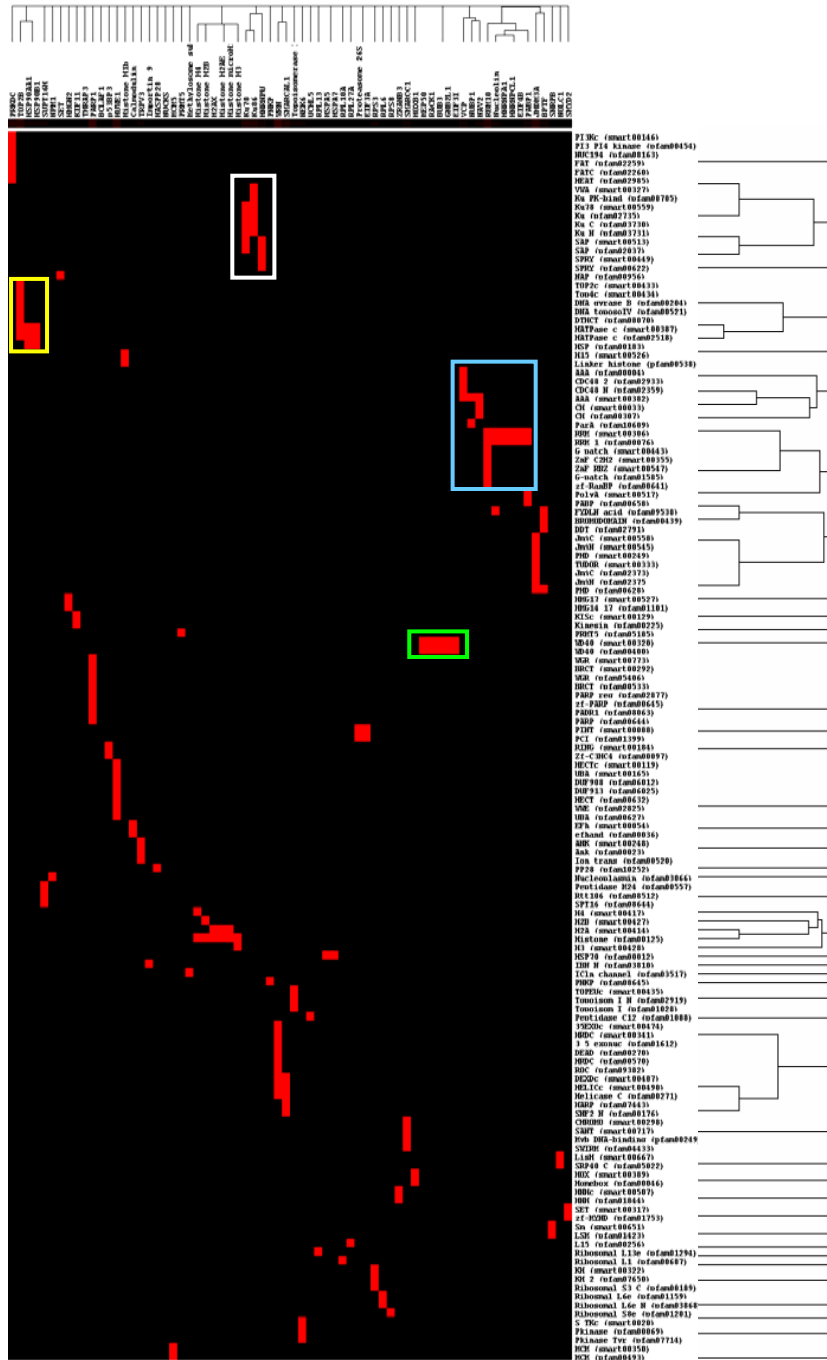

B

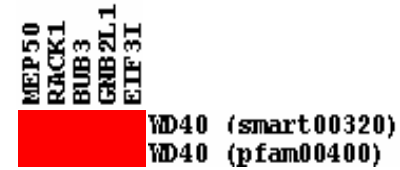

C

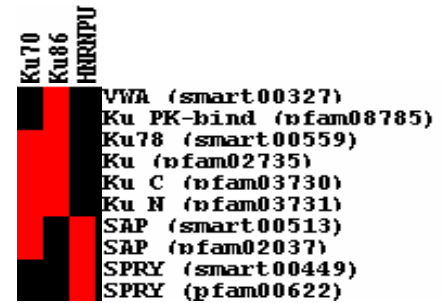

D

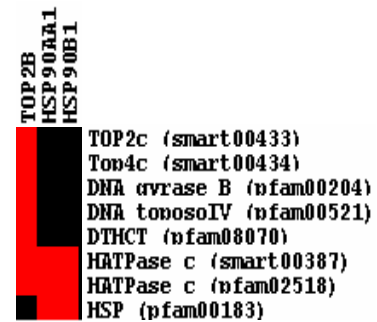

E

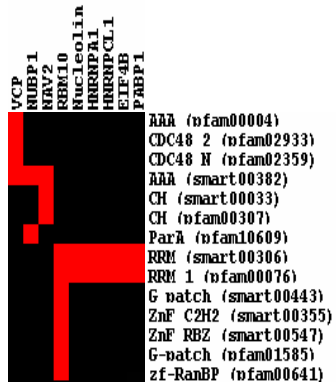

Domains

Supplement Fig. 3

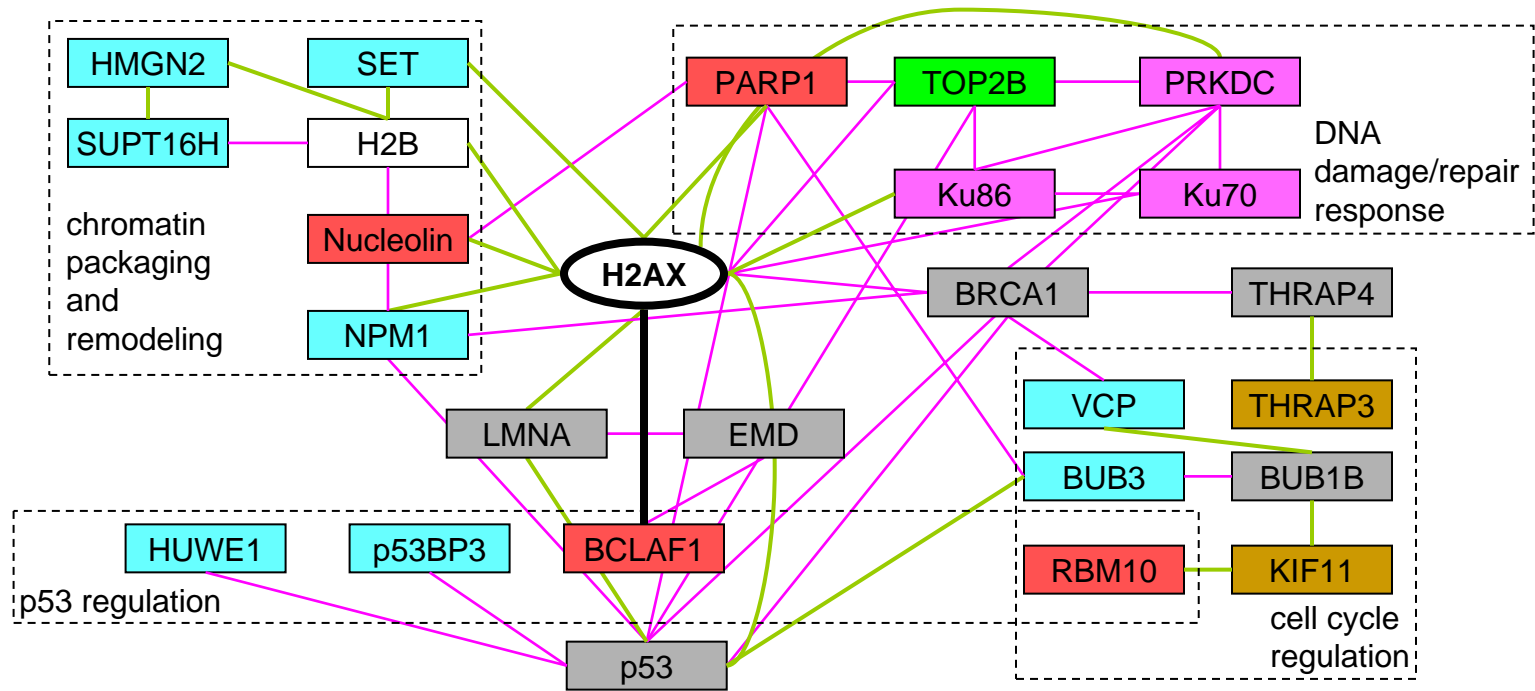



# Supplement Fig. 4

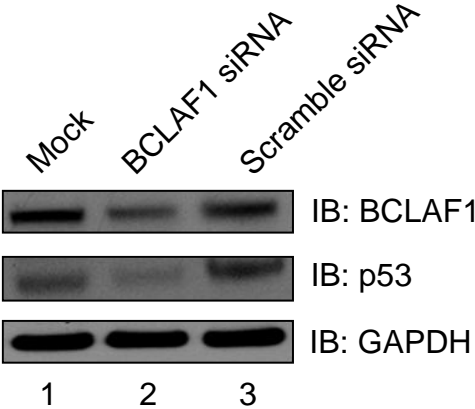

# Supplement Fig. 5

N

NI

AR

A549

+ BCLAF1  
siRNA

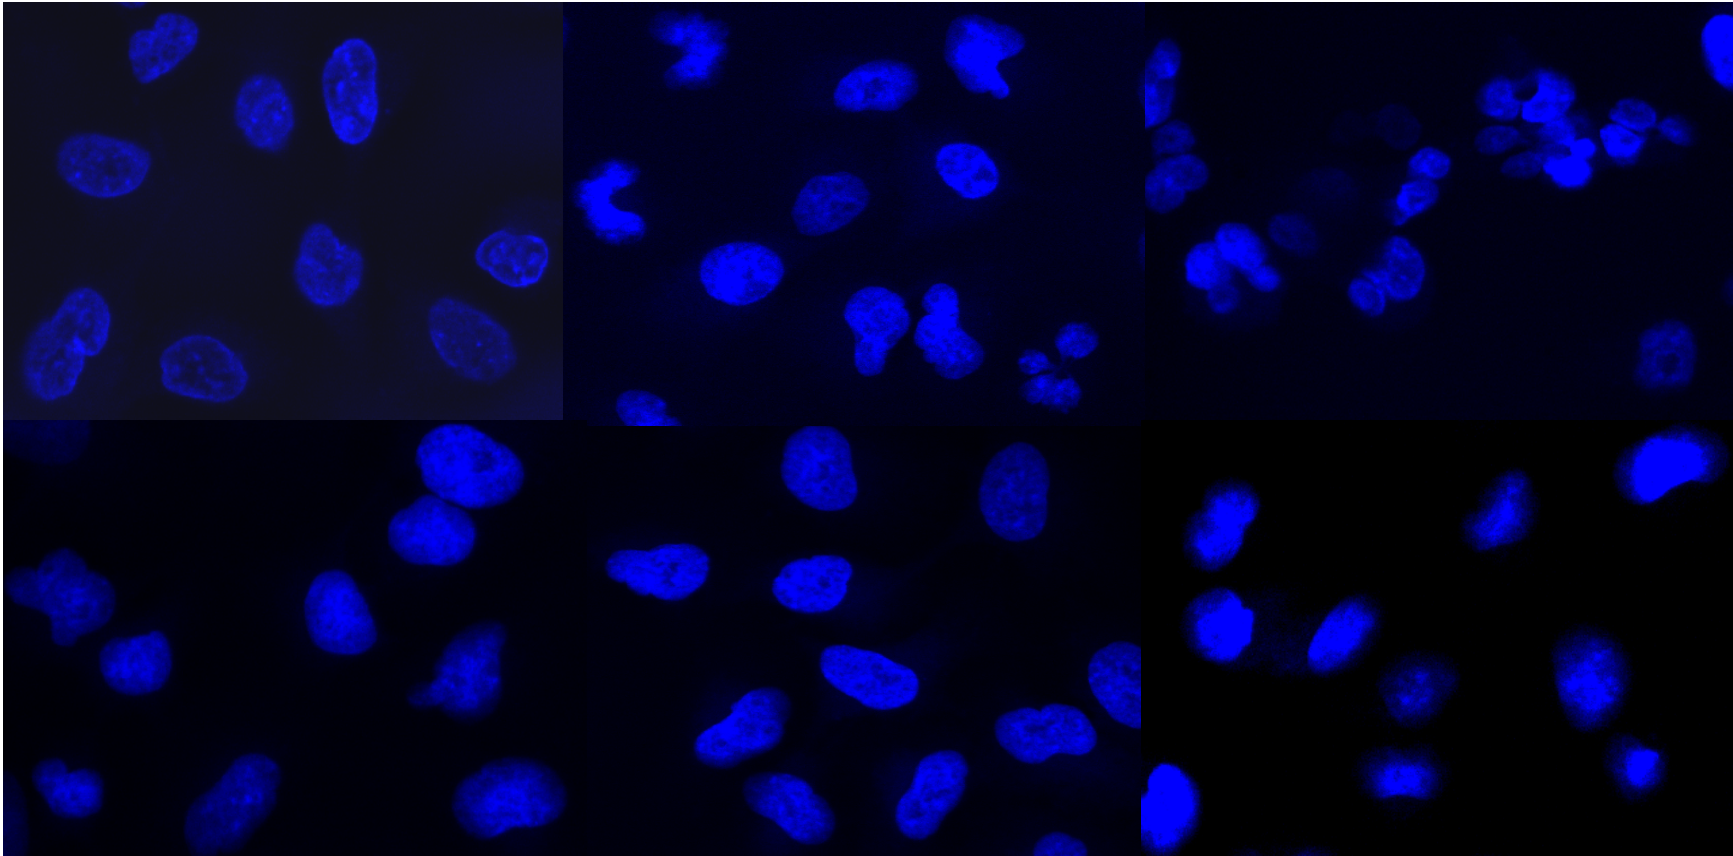

# Supplement Fig. 6

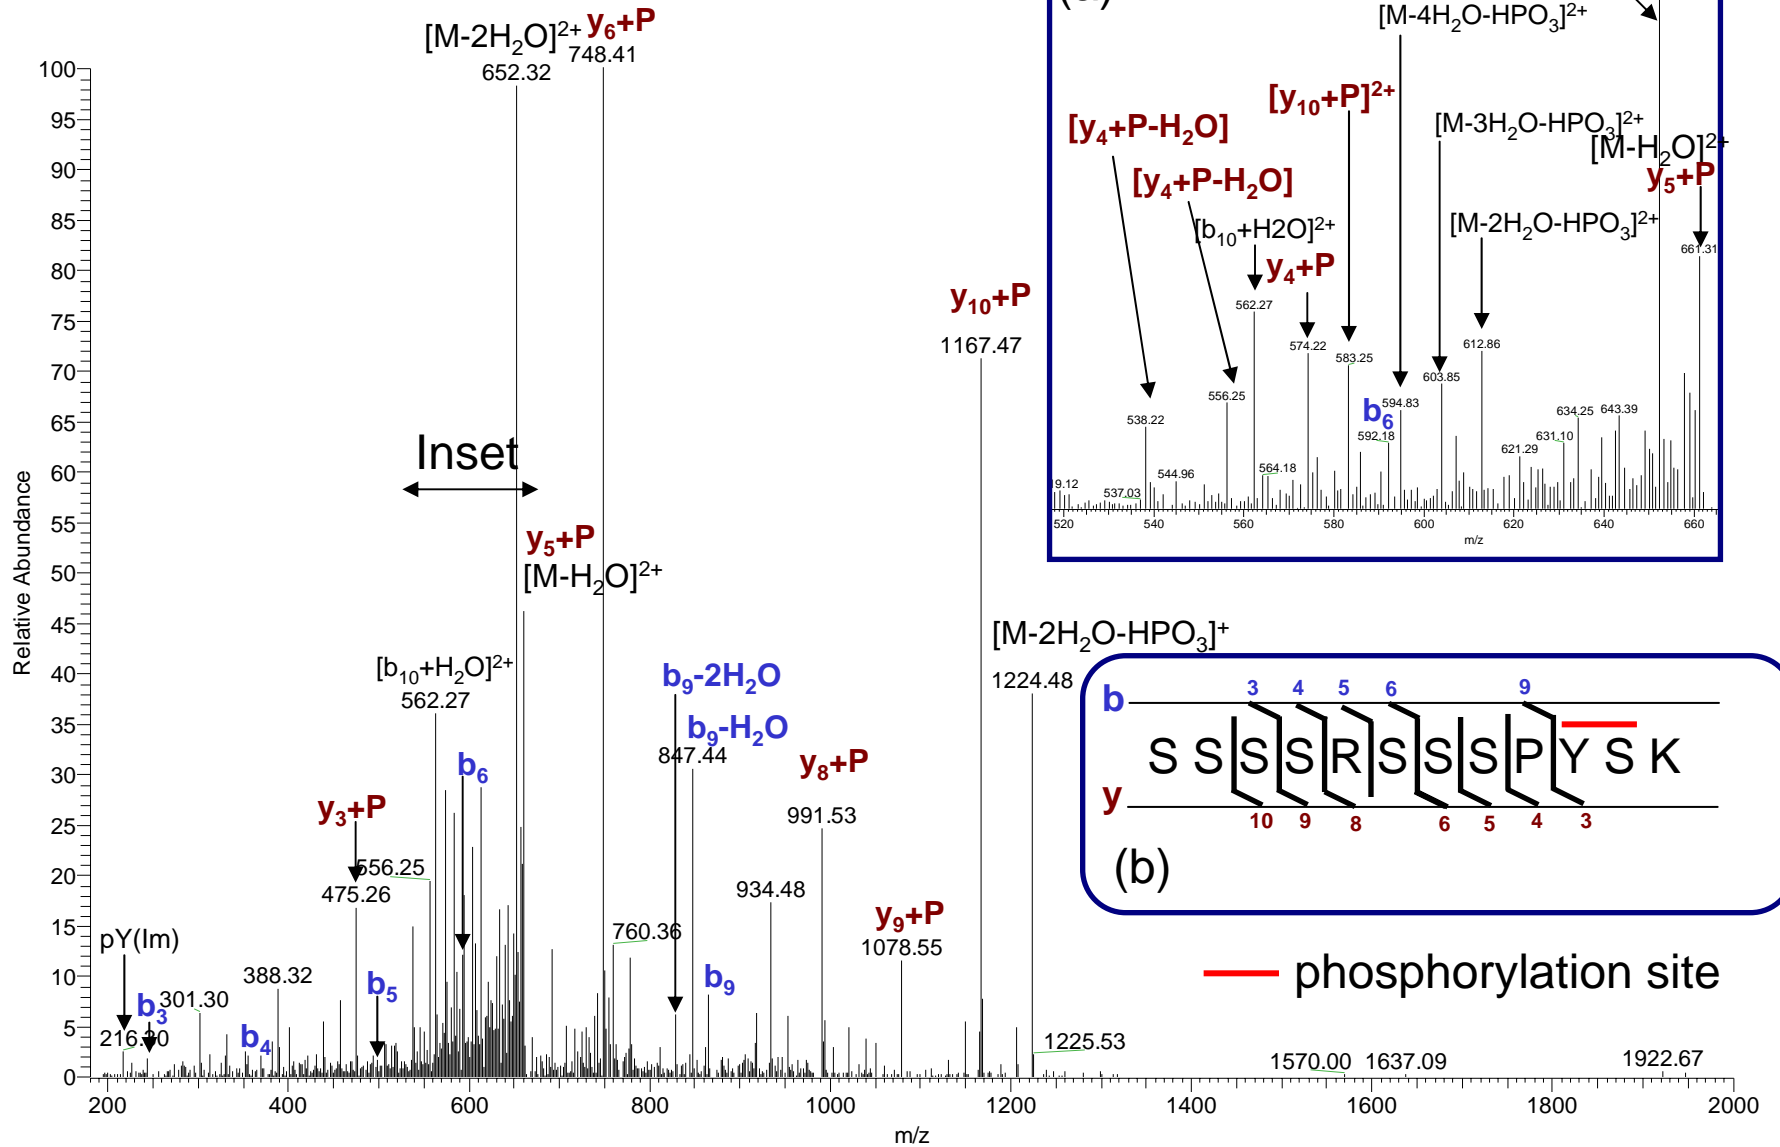

Supplement Fig. 7

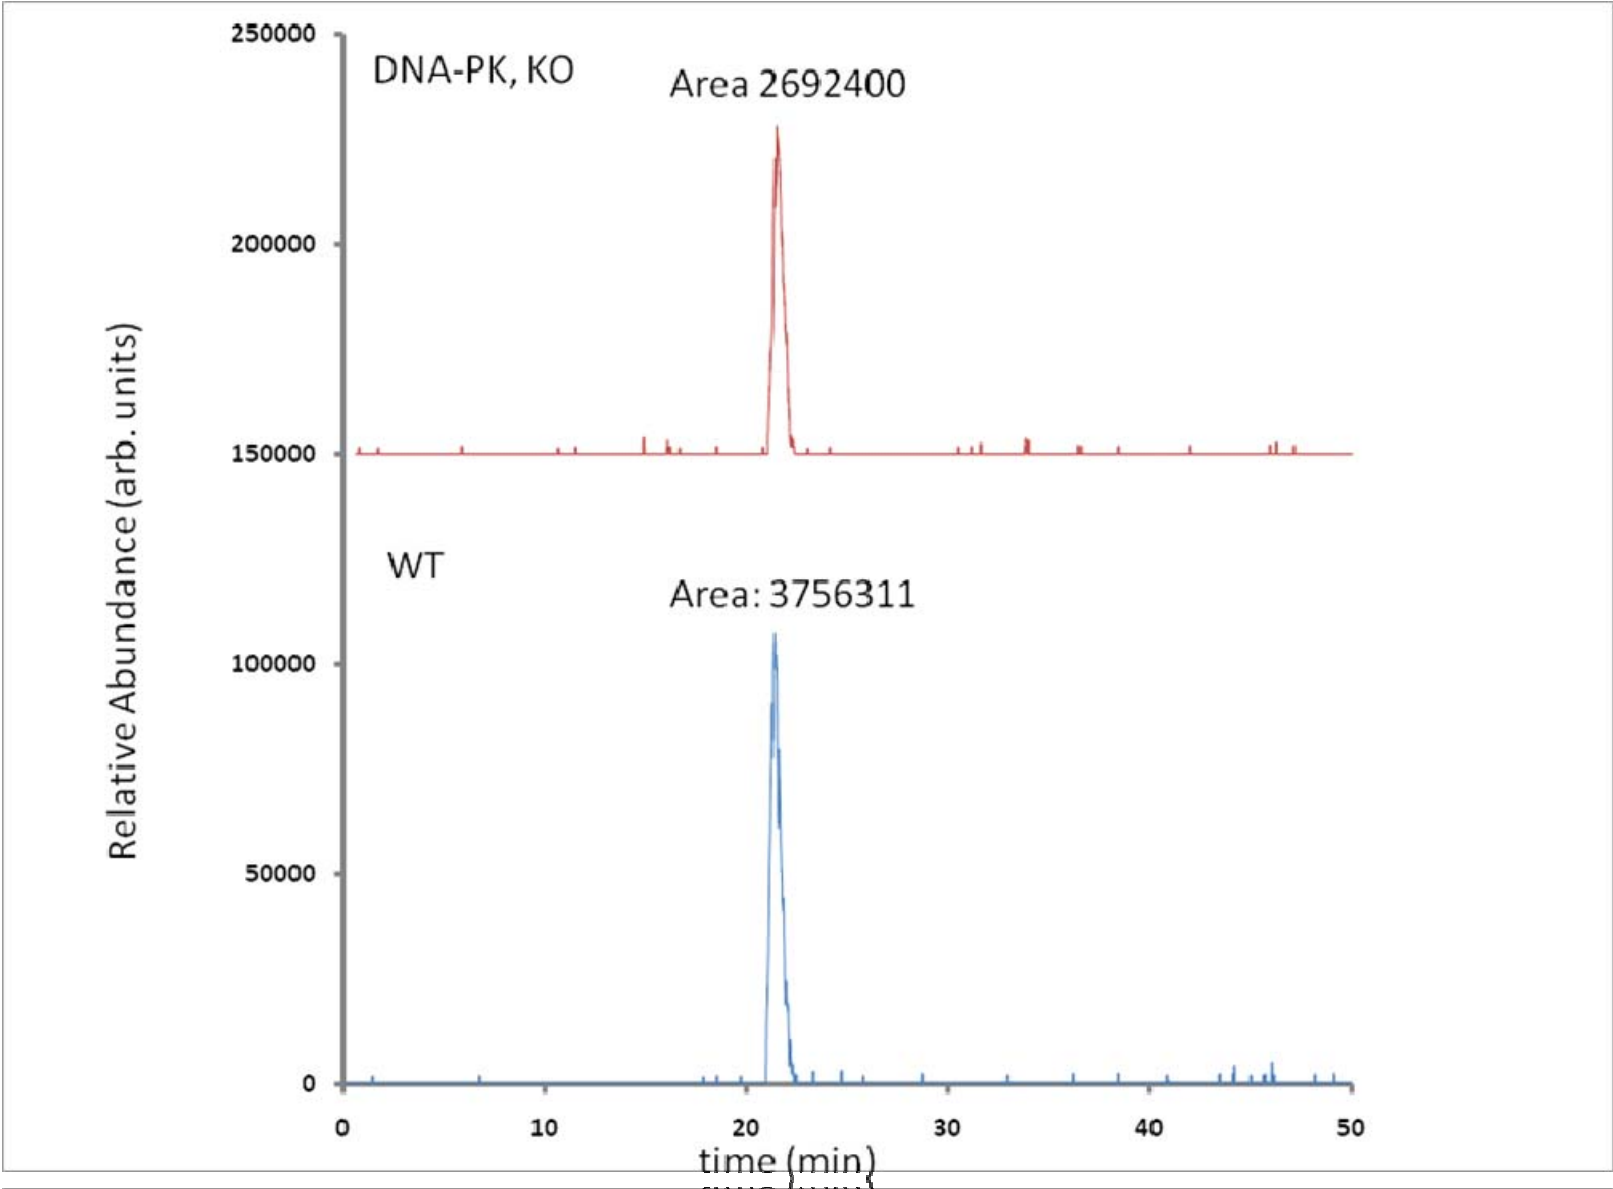

# Supplement Fig. 8

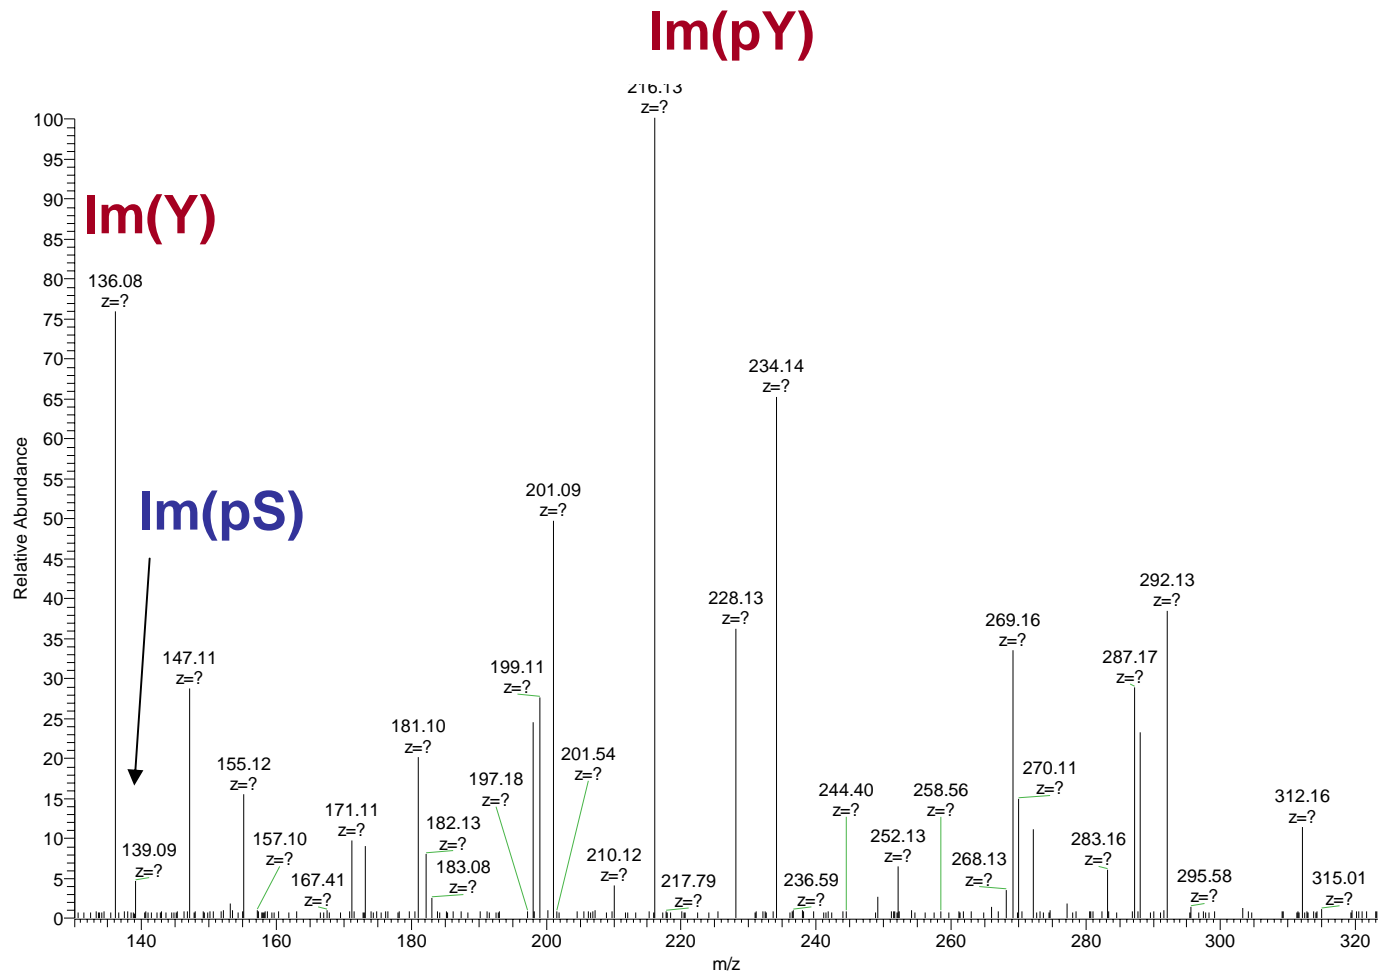

| <b>Supplemental Table 1.</b> The Peptides Derived From the Immunoprecipitates Identified by MS |                       |                                                                                                                           |                                           |                            |                                               |
|------------------------------------------------------------------------------------------------|-----------------------|---------------------------------------------------------------------------------------------------------------------------|-------------------------------------------|----------------------------|-----------------------------------------------|
| NCBI accession no.                                                                             | Protein Name          | Peptide Identified                                                                                                        | Ion Score <sup>a</sup>                    | Protein Score <sup>b</sup> | Peptide Score <sup>c</sup>                    |
| <b>1. Histones</b>                                                                             |                       |                                                                                                                           |                                           |                            |                                               |
| gi 48146275                                                                                    | Histone H2AX (bait)   | GHYAER<br>HLQLAIR<br>KGHYAER<br>AGLQFPVGR<br>LLGGVTIAQGGVLPNIQAVLLPK<br>AGLQFPVGR                                         | 41<br>44<br>31<br>65<br>17<br>-           | 198                        | -<br>-<br>-<br>-<br>-<br>2.54                 |
| gi 356168                                                                                      | Histone H1b           | SGVSLAALKK<br>ALAAAGYDVEK<br>ASGPPVSELITK<br>KASGPPVSELITK<br>ALAAAGYDVEKNNR<br>SGVSLAALKK<br>ALAAAGYDVEK<br>ASGPPVSELITK | 30<br>37<br>65<br>79<br>87<br>-<br>-<br>- | 298                        | -<br>-<br>-<br>-<br>-<br>2.73<br>3.58<br>3.11 |
| gi 10800144                                                                                    | Histone H2A, member E | GNYAER<br>KGNYAER<br>AGLQFPVGR<br>VTIAQGGVLPNIQAVLLPK                                                                     | 22<br>41<br>73<br>106                     | 242                        | -                                             |
| gi 1568557                                                                                     | Histone H2B           | EIQTA VR<br>LAHYNKR<br>LLPGELAK                                                                                           | 40<br>37<br>30                            | 107                        | -                                             |
| gi 1568559                                                                                     | Histone H3            | IRGERA<br>KLPFQR<br>YRPGTVALR                                                                                             | 31<br>22<br>15                            | 68                         | -                                             |
| gi 45767731                                                                                    | Histone H4            | TLYGFGG                                                                                                                   | 43                                        | 303                        | -                                             |

|                                                               |                                                                          |                                                                                             |                                   |     |                             |
|---------------------------------------------------------------|--------------------------------------------------------------------------|---------------------------------------------------------------------------------------------|-----------------------------------|-----|-----------------------------|
|                                                               |                                                                          | VFLENVIR<br>ISGLIYEETR<br>DNIQGITKPAIR<br>ISGLIYEETRGLVK<br>KTVTAMDVVYALKR<br>DNIQGITKPAIRR | 21<br>38<br>112<br>17<br>21<br>51 |     |                             |
| gi 3493529                                                    | Histone microH2A1.2                                                      | SIAFPSIGSGR                                                                                 | 21                                | 21  | -                           |
| <b>2. Intracellular protein traffic and signaling cascade</b> |                                                                          |                                                                                             |                                   |     |                             |
| <b>a. Ca<sup>2+</sup> binding/signaling</b>                   |                                                                          |                                                                                             |                                   |     |                             |
| gi 825671                                                     | Nucleophosmin/B23 (NPM1)                                                 | ADKDYHFK<br>VDNDENEHQLSLR<br>MTDQEAIQDLWQWR<br>FINYVK<br>MSVQPTVSLGGFEITPPVVLR              | 34<br>96<br>18<br>-<br>-          | 148 | -<br>-<br>-<br>2.24<br>4.85 |
| gi 825635                                                     | Calmodulin (CALM1)                                                       | VFDKDGNGYISAAELR                                                                            | 68                                | 68  | -                           |
| gi 21435923                                                   | Transient receptor potential cation channel subfamily V member 3 (TRPV3) | RMYDMILLR                                                                                   | 40                                | 40  | -                           |
| <b>b. Protein import</b>                                      |                                                                          |                                                                                             |                                   |     |                             |
| gi 21361659                                                   | Importin 9 (IPO9)                                                        | LLQHGINADDKR<br>EALVDTLTGILSPVQEV                                                           | 18<br>17                          | 35  | -                           |
| <b>3. Signal transduction</b>                                 |                                                                          |                                                                                             |                                   |     |                             |
| gi 2498464                                                    | 28 kDa heat- and acid-stable phosphoprotein (HASPP28)                    | MQSLSLNK<br>VTQLDLDGPK<br>GVEGLIDIENPNR                                                     | -<br>-<br>-                       | -   | 2.56<br>2.99<br>3.66        |
| gi 15559817                                                   | Guanine nucleotide-binding protein subunit beta-2-like 1 (GNB2L1)        | DETNYGIPQR<br>DVLSVAFSSDNR                                                                  | 47<br>18                          | 65  | -                           |
| gi 47605556                                                   | Bcl-2-associated transcription factor 1 (BCLAF1/Btf)                     | IDISPSTLR<br>EYSGFAGVSR<br>SSFYPDGGDQETAK<br>VFLDR                                          | -<br>-<br>-<br>-                  |     | -<br>-<br>3.31<br>2.22      |

|                      |                                                                          |                                                                                                                                                            |                                                         |     |                                                                          |
|----------------------|--------------------------------------------------------------------------|------------------------------------------------------------------------------------------------------------------------------------------------------------|---------------------------------------------------------|-----|--------------------------------------------------------------------------|
| gi 31874030          | RNA-binding protein 10 (RBM10)                                           | GSSYGVSTSTESYK<br>LDQQTLP LGG R<br>TINVEFAK<br>ESATADAGYAILEK                                                                                              | -<br>-<br>-<br>-                                        | -   | 3.14<br>3.03<br>2.29<br>4.11                                             |
| gi 97537467          | Thyroid hormone receptor-associated protein 3 (THRAP3)                   | TDSEK PFR<br>SPLQSVVVR<br>YKDDPV DLR<br>SIFQHIQSAQSQR<br>ASAVSELSPR<br>GSFSDTGLGDGK<br>SPLQSVVVR.R                                                         | 18<br>31<br>34<br>16<br>-<br>-<br>-                     | 99  | -<br>-<br>-<br>-<br>3.22<br>3.43<br>2.57                                 |
| <b>4. Cell cycle</b> |                                                                          |                                                                                                                                                            |                                                         |     |                                                                          |
| gi 11095436          | Transitional endoplasmic reticulum ATPase (VCP)                          | HPALFK<br>GDIFLVR                                                                                                                                          | 32<br>18                                                | 50  | -                                                                        |
| gi 1155084           | Kinesin-like protein KIF11 (KIF11)                                       | QIDVYR<br>TPHVPYR<br>NGVYISEENFR<br>LNLVDLAGSENIGR<br>ILQDSLGG R<br>IGAVEEELNR<br>LLNTVEETTK<br>VTELFMDNK<br>LTDNGTEFSVK<br>ETTIDG EELVK<br>LNLVDLAGSENIGR | 19<br>13<br>18<br>51<br>-<br>-<br>-<br>-<br>-<br>-<br>- | 101 | -<br>-<br>-<br>-<br>2.47<br>3.68<br>3.23<br>2.73<br>2.93<br>2.84<br>3.23 |
| gi 7387554           | Mitotic checkpoint protein BUB3 (BUB3)                                   | KLNQPPEDGISSVKF<br>RVAVEYL DPSPEVQKK                                                                                                                       | -<br>-                                                  | -   | 2.94<br>3.82                                                             |
| gi 10437591          | Nuclear ubiquitous casein and cyclin-dependent kinases substrate (NUCKS) | SSPREAKNK                                                                                                                                                  | 29                                                      | 29  | -                                                                        |
| gi 13177775          | Minichromosome maintenance deficient protein                             | RYRVGTDR                                                                                                                                                   | 27                                                      | 27  |                                                                          |



|                                               |                                                        |                                                                                                                                                                              |                                                    |     |                                                                  |
|-----------------------------------------------|--------------------------------------------------------|------------------------------------------------------------------------------------------------------------------------------------------------------------------------------|----------------------------------------------------|-----|------------------------------------------------------------------|
|                                               | 5 (MCM5)                                               |                                                                                                                                                                              |                                                    |     |                                                                  |
| <b>5. Protein metabolism and modification</b> |                                                        |                                                                                                                                                                              |                                                    |     |                                                                  |
| gi 2323410                                    | Protein arginine N-methyltransferase 5 (PRMT5)         | LYNEVR<br>SDLLSGR<br>EFIQEPK<br>VPLVAPEDLR<br>YSQYQQAIYK<br>AAILPTSIFLTNK<br>LSPWIRPDSK<br>DDGVSIPGEYTSFLAPISSSK                                                             | 30<br>24<br>30<br>61<br>50<br>34<br>32<br>21       | 282 | -                                                                |
| gi 14495615                                   | Methylosome protein 50 (WDR77)                         | ILLWDTR<br>ETPPPLVPPAAR<br>SDGALLLGASSLSGR<br>VWDLAQVVLSSYR<br>KETPPPLVPPAAR<br>ILLWDTR<br>YRSDGALLLGASSLSGR<br>SDGALLLGASSLSGR<br>YEHDDIVSTVSVLSSGTQAVSGSK<br>VWDLAQVVLSSYR | 36<br>46<br>37<br>17<br>-<br>-<br>-<br>-<br>-<br>- | 136 | -<br>-<br>-<br>-<br>3.24<br>2.60<br>4.11<br>4.97<br>4.28<br>5.06 |
| gi 8571386                                    | Methylosome subunit pICln (CLNS1A)                     | SFPPPGAEGLLR                                                                                                                                                                 | 31                                                 | 31  | -                                                                |
| gi 157502195                                  | Proteasome 26S non-ATPase regulatory subunit 1 (PSMD1) | VLDLQVIK<br>LNIGDLQVTK                                                                                                                                                       | -<br>-                                             | -   | 2.80<br>3.11                                                     |
| gi 833318444                                  | Heat shock protein HSP 90-alpha (HSP90AA1)             | ALLFVPR<br>APFDLFENR<br>RAPFDLFENR<br>HFSVEGQLEFR<br>GVVDSIDLPLNISR<br>ADHGEPVGR<br>IDIIPNPQER                                                                               | 37<br>15<br>18<br>18<br>28<br>19<br>35             | 170 | -                                                                |

|                                                              |                                                          |                                                                                                                                                                                     |                                                |     |                                                                              |
|--------------------------------------------------------------|----------------------------------------------------------|-------------------------------------------------------------------------------------------------------------------------------------------------------------------------------------|------------------------------------------------|-----|------------------------------------------------------------------------------|
| gi 119360                                                    | Endoplasmin (HSP90B1)                                    | KSGTSEFLNKM<br>RSGYLLPDTKA<br>KLIINSLYKN<br>KSILFVPTSAPRG                                                                                                                           | -<br>-<br>-<br>-                               | -   | 2.61<br>2.74<br>2.86<br>3.60                                                 |
| gi 86577744                                                  | 78 kDa glucose-regulated protein (HSPA5)                 | KITITNDQNRL<br>KVLEDSLKK<br>RTWNDPSVQQDIKF<br>KDAGTIAGLNVMRI<br>KNQLTSNPENTVFDAGR<br>KSQIFSTASDNQPTVTIKV<br>RITPSYVAFTPEGERL<br>RNELESYAYSLKN<br>KELEEIVQPIISKL<br>KTFAPEEISAMVLTKM | -<br>-<br>-<br>-<br>-<br>-<br>-<br>-<br>-<br>- | -   | 2.84<br>2.31<br>3.38<br>3.79<br>4.51<br>5.14<br>4.11<br>3.40<br>4.21<br>3.82 |
| gi 158518381                                                 | Putative heat shock 70 kDa protein 7 (HSPA7)             | RVEILANDQGNRT                                                                                                                                                                       | -                                              | -   | 3.85                                                                         |
| gi 55859546                                                  | Ubiquitin carboxyl-terminal hydrolase isozyme L5 (UCHL5) | KEFSQSFDAAMKG<br>RLDTIFFAKQ                                                                                                                                                         | -<br>-                                         | -   | 2.74<br>2.31                                                                 |
| gi 10121890                                                  | Serine/threonine-protein kinase Nek6 (NEK6)              | RLIPER                                                                                                                                                                              | 24                                             | 24  | -                                                                            |
| gi 40788326                                                  | Lysine-specific demethylase 4A (KDM4A)                   | VINSRYR<br>GSAARFSER                                                                                                                                                                | 15<br>12                                       | 27  |                                                                              |
| gi 38174276                                                  | E3 ubiquitin-protein ligase Topors (TOPORS)              | ETKHKR<br>RSTSLSSPR                                                                                                                                                                 | 11<br>12                                       | 23  |                                                                              |
| gi 56417899                                                  | E3 ubiquitin-protein ligase HUWE1 (HUWE1)                | ITPAMAARIK<br>FDMAENVVIVASQKRPLGGR                                                                                                                                                  | 24<br>24                                       | 48  |                                                                              |
| <b>6. Nucleoside, nucleotide and nucleic acid metabolism</b> |                                                          |                                                                                                                                                                                     |                                                |     |                                                                              |
| <b>a. DNA repair and damage</b>                              |                                                          |                                                                                                                                                                                     |                                                |     |                                                                              |
| gi 22902366                                                  | Poly (ADP-ribose) polymerase 1 (PARP1)                   | KPPLLNNADSVQAK<br>VVSEDFLQDVSASTK<br>IAPPEAPVTGYMFGK<br>LLWHGSR                                                                                                                     | 110<br>110<br>52<br>22                         | 596 | -<br>-<br>-<br>-                                                             |



|                                              |                                                       |                                                                                                                                   |                                                       |    |                                                         |
|----------------------------------------------|-------------------------------------------------------|-----------------------------------------------------------------------------------------------------------------------------------|-------------------------------------------------------|----|---------------------------------------------------------|
|                                              | (Ku86)                                                | ANPQVGVAFPHIK<br>FFMGNQVLK<br>TLFPLIEAK<br>YAYDKR<br>FSEEQR<br>FNNFLK<br>SILQER<br>KEEASGSSVTAEAAKK<br>KVITMFVQRQ<br>RYGSDIVPFSKV | 68<br>27<br>30<br>14<br>10<br>16<br>21<br>-<br>-<br>- |    | -<br>-<br>-<br>-<br>-<br>-<br>-<br>4.34<br>2.78<br>3.57 |
| gi 37231                                     | DNA topoisomerase 2-beta (TOP2B)                      | FLYDDNQR<br>EVTFVPGLYK<br>ELILFSNSDNER<br>SIPSLVDGFKPGQR                                                                          | 29<br>32<br>27<br>16                                  | 99 | -                                                       |
| gi 5739524                                   | Werner syndrome ATP-dependent helicase (WRN)          | DISENLYSLR                                                                                                                        | 20                                                    | 20 |                                                         |
| gi 5764101                                   | Bifunctional polynucleotide phosphatase/kinase (PNKP) | MGEVEAPGR                                                                                                                         | 17                                                    | 17 |                                                         |
| gi 20072751                                  | DNA topoisomerase I (TOP1)                            | SRSVLEK<br>LNXLDPR                                                                                                                | 21<br>20                                              | 41 |                                                         |
| <b>b. Chromatin packaging and remodeling</b> |                                                       |                                                                                                                                   |                                                       |    |                                                         |
| gi 6005757                                   | FACT complex subunit SPT16 (SUPT16H)                  | RVMEIVDADEKV<br>KELAAQLNEEAKR<br>KAASITSEVFNKF                                                                                    | -<br>-<br>-                                           | -  | 2.72<br>3.55<br>3.39                                    |
| gi 49457053                                  | Protein SET (SET)                                     | RVEVTEFEDIKS<br>RLNEQASEEILKV<br>RIDFYFDENPYFENKV                                                                                 | -<br>-<br>-                                           | -  | 4.04<br>3.88<br>5.26                                    |
| gi 89040736                                  | Non-histone chromosomal protein HMG-17 (HMGN2)        | VKDEPQRR<br>LSAKPAPPKPEPK                                                                                                         | 30<br>62                                              | 92 | -<br>-                                                  |
| gi 13559170                                  | Nucleotide-binding protein 1 (NUBP1)                  | PGNLAGVR                                                                                                                          | 20                                                    | 20 | -                                                       |

|                                                |                                                                                                               |                                                                                               |                                 |    |                                                      |
|------------------------------------------------|---------------------------------------------------------------------------------------------------------------|-----------------------------------------------------------------------------------------------|---------------------------------|----|------------------------------------------------------|
| gi 6693791                                     | SWI/SNF-related matrix-associated actin-dependent regulator of chromatin subfamily A-like protein 1 (SMARCA1) | IDGSTSSAER                                                                                    | 20                              | 20 | -                                                    |
| gi 1549239                                     | SWI/SNF complex subunit SMRCC1 (SMRCC1)                                                                       | RFDLQNPSR                                                                                     | 17                              | 17 |                                                      |
| gi 6683492                                     | Nucleosome-remodeling factor subunit BPTF (BPTF)                                                              | DATPLSR                                                                                       | 19                              | 19 |                                                      |
| <b><u>c. Pre-mRNA processing</u></b>           |                                                                                                               |                                                                                               |                                 |    |                                                      |
| gi 3183544                                     | Polyadenylate-binding protein 1 (PABPC1)                                                                      | SGVGNIFIK<br>ALDTMNFVVIK                                                                      | -<br>-                          | -  | 2.31<br>3.27                                         |
| gi 31455242                                    | Nucleolin (NCL)                                                                                               | NDLAVVDVR<br>ALELTGLK<br>EVFEDAAEIR<br>TGISDVFAK<br>GIAYIEFK<br>KGLSEDTEETLKE<br>RSISLYYTGEKG | -<br>-<br>-<br>-<br>-<br>-<br>- | -  | 3.29<br>2.33<br>2.87<br>2.73<br>2.44<br>3.32<br>3.32 |
| gi 145559503                                   | Nucleolar phosphoprotein p130 (NOLC1)                                                                         | RDNQLSEVANKF<br>KAALSLPAKQ                                                                    | -<br>-                          | -  | 3.11<br>2.30                                         |
| gi 14141163                                    | Heterogeneous nuclear ribonucleoprotein U (HNRNPU)                                                            | KNGQDLGVAFKI<br>KYNILGTNTIMDKM                                                                | -<br>-                          | -  | 2.65<br>4.18                                         |
| gi 45709273                                    | Heterogeneous nuclear ribonucleoprotein A1 (HNRNPA1)                                                          | KTFNPGAGLPTDKK<br>KGLLQSGQIPGRE<br>IEVIEIMTDR                                                 | -<br>-<br>-                     | -  | 2.68<br>3.68<br>3.65                                 |
| gi 33877030                                    | Heterogeneous nuclear ribonucleoprotein CL1 (HNRNPCL1)                                                        | KSDVEAIFSKY<br>RVFIGNLNTLVVKK                                                                 | -<br>-                          | -  | 2.80<br>3.72                                         |
| gi 134037                                      | Small nuclear ribonucleoprotein-associated protein B and B' (SNRPB)                                           | RGENLVSMTVEGPPPKD<br>RVLGLVLLRG                                                               | -<br>-                          | -  | 4.92<br>2.74                                         |
| <b><u>d. mRNA transcription regulation</u></b> |                                                                                                               |                                                                                               |                                 |    |                                                      |
| gi 64654265                                    | Homeobox protein Hox-B1 (HOXB1)                                                                               | RNPPKTGR                                                                                      | 21                              | 21 | -                                                    |

|                                  |                                                              |                                                                                                                   |                                 |    |                                                      |
|----------------------------------|--------------------------------------------------------------|-------------------------------------------------------------------------------------------------------------------|---------------------------------|----|------------------------------------------------------|
| gi 217540605                     | Zinc finger Ran-binding domain-containing protein 3 (ZRANB3) | RYCNAHIR                                                                                                          | 21                              | 21 | -                                                    |
| gi 9910274                       | SET and MYND domain-containing 2 (SMYD2)                     | KEGLSKCGR                                                                                                         | 18                              | 18 |                                                      |
| <b>e. Translation Processing</b> |                                                              |                                                                                                                   |                                 |    |                                                      |
| gi 4503513                       | Eukaryotic translation initiation factor 3 subunit I (EIF3I) | RDMTMFVTASKD<br>KSYSSGGEDGYVRI<br>KSGEVLVNVKE<br>RDPSQIDNNEPYMKI<br>RQINDIQLSRD<br>KLFDDSTTLEHQKT<br>REGDLLFTVAKD | -<br>-<br>-<br>-<br>-<br>-<br>- | -  | 3.57<br>4.01<br>3.56<br>4.24<br>2.39<br>3.40<br>2.91 |
| gi 1399801                       | Eukaryotic translation initiation factor 3 subunit A (EIF3A) | RDEERPR                                                                                                           | 22                              | 22 | -                                                    |
| gi 50053795                      | Eukaryotic translation initiation factor 4B (EIF4B)          | KVAPAQPSEEGPGRK<br>RGLNISAVRL                                                                                     | -<br>-                          | -  | 2.35<br>2.49                                         |
| gi 4506625                       | 60S ribosomal protein L27a (RPL27A)                          | AKFFSRR                                                                                                           | 20                              | 20 | -                                                    |
| gi 62204505                      | 60S ribosomal protein L13 (RPL13)                            | KLATQLTGPVMPVRN<br>RGFSLEELRV                                                                                     | -<br>-                          | -  | 3.19<br>2.22                                         |
| gi 4490422                       | 60S ribosomal protein L10a (RPL10A)                          | RDTLYEAVRE                                                                                                        | -                               | -  | 2.70                                                 |
| gi 15718687                      | 40S ribosomal protein S3 (RPS3)                              | KLLGGLAVRR<br>KDEILPTTPISEQKG<br>KFVADGIFKA<br>KAELNEFLTRE                                                        | -<br>-<br>-<br>-                | -  | 2.32<br>2.60<br>2.54<br>2.72                         |
| gi 89027564                      | 60S ribosomal protein L6 (RPL6)                              | KFVIATSTKI<br>KAVDSQILPKI                                                                                         | -<br>-                          | -  | 2.39<br>2.44                                         |
| gi 55961080                      | 40S ribosomal protein S8 (RPS8)                              | RADGYVLEGKE<br>KLTPEEEEEILNKK<br>KISSLLEEQFQQGKL                                                                  | -<br>-<br>-                     | -  | 3.01<br>2.74<br>4.42                                 |
| gi 16212066                      | S60S ribosomal protein L13 (RPL13)                           | KSTESLQANVQRL                                                                                                     | -                               | -  | 3.39                                                 |

|                                       |                           |                                                                                                               |                                         |     |      |
|---------------------------------------|---------------------------|---------------------------------------------------------------------------------------------------------------|-----------------------------------------|-----|------|
|                                       |                           | RTIGISVDPRR                                                                                                   | -                                       |     | 2.51 |
| <b>7. Cell structure and motility</b> |                           |                                                                                                               |                                         |     |      |
| gi 28336                              | $\beta$ -tubulin          | IIAPPER<br>AGFAGDDAPR<br>GYSFTTTAER<br>AVFPSIVGRPR<br>QEYDESGPSIVHR<br>SYELPDGQVITIGNER<br>VAPEEHPVLLTEAPLNPK | 26<br>32<br>50<br>53<br>57<br>67<br>107 | 392 | -    |
| gi 19744388                           | Neuron navigator 2 (NAV2) | IALKGIAQR                                                                                                     | 34                                      | 34  | -    |

a and b, the ion score and protein score were calculated respectively by MASCOT.  
c, the score was calculated from Xcalibur software.

**Supplement Table 2.** The Proteins in the H2AX Complexes Derived from the Cells Irradiated by IR at 7.5 cGy and 10Gy Identified and Quantified by SILAC-based MS

| NCBI accession no.                           | Protein name | Domain (SMART)          | Domain (Pfam)                                | Fold of change <sup>a</sup> |                   |       |      | No. of peptides |
|----------------------------------------------|--------------|-------------------------|----------------------------------------------|-----------------------------|-------------------|-------|------|-----------------|
|                                              |              |                         |                                              | 7.5 cGy                     |                   | 10 Gy |      |                 |
|                                              |              |                         |                                              | ratio                       | S.D. <sup>b</sup> | ratio | S.D. |                 |
| <b>1. Histones</b>                           |              |                         |                                              |                             |                   |       |      |                 |
| gi 48146275                                  | Histone H2AX | H2A                     | Histone                                      | -                           | -                 | -     | -    | 5               |
| gi 1568557                                   | Histone H2B  | H2B                     | Histone                                      | 0.99                        | 0.03              | 0.98  | 0.02 | 3               |
| gi 45767731                                  | Histone H4   | H4                      | Histone                                      | 0.80                        | 0.11              | 0.75  | 0.06 | 7               |
| <b>2. DNA damage/repair response</b>         |              |                         |                                              |                             |                   |       |      |                 |
| gi 13606056                                  | PRKDC        | PI3Kc                   | PI3_PI4_kinase, NUC194, FAT, FATC, HEAT      | 2.30                        | 0.07              | 2.66  | 0.04 | 5               |
| gi 49457432                                  | Ku70         | Ku78, SAP               | Ku, Ku_C, Ku_N, SAP                          | 2.78                        | 0.61              | 2.84  | 0.69 | 3               |
| gi 10863945                                  | Ku86         | Ku78, VWA               | Ku, Ku_C, Ku_N, Ku_PK_bind                   | 3.19                        | 0.06              | 3.45  | 0.23 | 11              |
| gi 37231                                     | TOP2B        | HATPase_c, TOP2c, Top4c | DNA_gyrase B, DNA_topoII V, DTHCT, HATPase_c | 1.36                        | 0.15              | 1.15  | 0.10 | 4               |
| <b>3. Chromatin packaging and remodeling</b> |              |                         |                                              |                             |                   |       |      |                 |
| gi 6005757                                   | SUPT16H      |                         | Peptidase_M24, Rtt106, SPT16                 | 0.16                        | 0.01              | 0.13  | 0.02 | 3               |
| gi 189306                                    | Nucleolin    | RRM                     | FYDLN_acid, RRM_1                            | 0.48                        | 0.08              | 1.36  | 0.07 | 7               |
| gi 825671                                    | NPM1         |                         | Nucleoplasmion                               | 0.41                        | 0.01              | 0.10  | 0.01 | 5               |
| gi 49457053                                  | SET          |                         | NAP                                          | 0.18                        | 0.01              | 0.11  | 0.02 | 3               |
| gi 89040736                                  | HMGN2        | HMG17                   | HMG14_17                                     | 0.23                        | 0.01              | 0.18  | 0.01 | 2               |
| <b>4. Cell cycle regulation</b>              |              |                         |                                              |                             |                   |       |      |                 |
| gi 1155084                                   | KIF11        | KISc                    | Kinesin                                      | 0.51                        | 0.03              | 0.83  | 0.10 | 10              |
| gi 97537467                                  | THRAP3       |                         |                                              | 0.54                        | 0.08              | 1.19  | 0.04 | 6               |
| gi 11095436                                  | VCP          | AAA                     | AAA,                                         | 0.36                        | 0.04              | 0.44  | 0.05 | 2               |



|                          |        |                                          |                                                       |      |      |      |      |    |  |
|--------------------------|--------|------------------------------------------|-------------------------------------------------------|------|------|------|------|----|--|
| gi 7387554               | BUB3   | WD40                                     | CDC48_2,<br>CDC48_N<br>WD40                           | 0.16 | 0.01 | 0.05 | 0.01 | 2  |  |
| <b>5. p53 regulation</b> |        |                                          |                                                       |      |      |      |      |    |  |
| gi 22902366              | PARP1  | WGR, BRCT                                | WGR, BRCT,<br>PARP_reg,<br>zf-PARP,<br>PADR1,<br>PARP | 0.70 | 0.12 | 1.76 | 0.23 | 22 |  |
| gi 47605556              | BCLAF1 |                                          |                                                       | 0.74 | 0.02 | 1.46 | 0.03 | 4  |  |
| gi 31874030              | RBM10  | G_patch,<br>RRM,<br>ZnF_C2H2,<br>ZnF_RBZ | G-patch,<br>RRM_1, zf-<br>RanBP                       | 0.66 | 0.10 | 1.54 | 0.02 | 4  |  |
| gi 38174276              | p53BP3 | RING                                     | Zf-C3HC4                                              | 0.77 | 0.05 | 0.61 | 0.02 | 2  |  |
| gi 56417899              | HUWE1  | HECTc, UBA                               | DUF908,<br>DUF913,<br>HECT, UBA,<br>WWE               | 0.31 | 0.03 | 0.45 | 0.04 | 2  |  |

a, For each arginine-containing peptide, a set of three isotope signals spacing by 6 Da and 10 Da were observed as the 'light (L0)' isotope peak was originally from the non-irradiated cells, respectively. The ratio of any paired heavy *versus* light isotope signals, *i.e.*, H6/L0 or H10/L0, was then correlated with the IR-induced dose-dependent abundance of individual protein bound to H2AX (bait). For most of non-specific contaminants their H/L ratios were close to a unity because of their possibly equal distribution in each immunoprecipitate, *e.g.*, hnRNPA1 (Fig. 1b).

b, Standard deviation (S.D) was obtained from the average of the L/H ratio of each peptide derived from individual proteins. We found the relative standard deviation (RSD) for quantitative measurements of H/L ratio was at 8.9 % and then used 3-fold RSD which was approximately equal to 30% changes in the H2AX-bound abundances as the threshold. LDIR, low-dose ionizing radiation (7.5 cGy of IR). HDIR, high-dose ionizing radiation (10 Gy of IR).

**Supplement Table 3.** The Identified H2AX-interacting Proteins and the Domains They Contain Revealed by SMART and Pfam

| <b>Protein Name</b>    | <b>Domain Name<br/>(SMART)</b>        | <b>Domain Name<br/>(Pfam)</b>                     |
|------------------------|---------------------------------------|---------------------------------------------------|
| Histone H2AX           | H2A                                   | Histone                                           |
| Histone H2B            | H2B                                   | Histone                                           |
| Histone H4             | H4                                    | Histone                                           |
| PRKDC                  | PI3Kc                                 | PI3_PI4_kinase,<br>NUC194, FAT, FATC,<br>HEAT     |
| Ku70                   | Ku78, SAP                             | Ku, Ku_C, Ku_N, SAP                               |
| Ku86                   | Ku78, VWA                             | Ku, Ku_C, Ku_N,<br>Ku_PK_bind                     |
| TOP2B                  | HATPase_c,<br>TOP2c, Top4c            | DNA_gyraseB,<br>DNA_toposoIV,<br>DTHCT, HATPase_c |
| SUPT16H                |                                       | Peptidase_M24, Rtt106,<br>SPT16                   |
| Nucleolin              | RRM                                   | FYDLN_acid, RRM_1                                 |
| NPM1                   |                                       | Nucleoplasmin                                     |
| SET                    |                                       | NAP                                               |
| HMG2N2                 | HMG17                                 | HMG14_17                                          |
| KIF11                  | KISc                                  | Kinesin                                           |
| THRAP3                 |                                       |                                                   |
| VCP                    | AAA                                   | AAA, CDC48_2,<br>CDC48_N                          |
| BUB3                   | WD40                                  | WD40                                              |
| PARP1                  | WGR, BRCT                             | WGR, BRCT,<br>PARP_reg, zf-PARP,<br>PADR1, PARP   |
| BCLAF1                 |                                       |                                                   |
| RBM10                  | G_patch, RRM,<br>ZnF_C2H2,<br>ZnF_RBZ | G_patch, RRM_1, zf-<br>RanBP                      |
| p53BP3                 | RING                                  | Zf-C3HC4                                          |
| HUWE1                  | HECTc, UBA                            | DUF908, DUF913,<br>HECT, UBA, WWE                 |
| Histone H1b            | H15                                   | Linker_histone                                    |
| Histone H2AE           | H2A                                   | Histone                                           |
| Histone H3             | H3                                    | Histone                                           |
| Histone<br>microH2A1.2 | H2A                                   | Histone                                           |
| Calmodulin             | EFh                                   | efhand                                            |
| TRPV3                  | ANK                                   | Ank                                               |

|                                                |                             |                                         |
|------------------------------------------------|-----------------------------|-----------------------------------------|
| Importin 9                                     |                             | Ion_trans                               |
| HASPP28                                        |                             | IBN_N                                   |
| RACK1                                          | WD40                        | PP28                                    |
| NUCKS                                          |                             | WD40                                    |
| MCM5                                           | MCM                         | MCM                                     |
| PRMT5                                          |                             | PRMT5                                   |
| MEP50                                          | WD40                        | WD40                                    |
| Methylosome subunit pICln                      |                             | ICln_channel                            |
| Proteasome 26S non-ATPase subunit 13 isoform 2 |                             |                                         |
| HSP90AA1                                       | HATPase_c                   | HSP90, HATPase_c                        |
| Endoplasmin precursor (HSP90B1)                | HATPase_c                   | HSP90, HATPase_c                        |
| HSPA5                                          |                             | HSP70                                   |
| Heat shock 70 kDa protein 7 (HSPA7)            |                             | HSP70                                   |
| UCHL5                                          |                             | Peptidase_C12                           |
| NIMA-related kinase 6                          | S_TKc                       | Pkinase                                 |
| JHDM3A                                         | JmjC, JmjN, PHD, TUDOR      | JmjC, JmjN, PHD                         |
| WRN                                            | 35EXOc, DEXDc, HELICc, HRDC | 3_5_exonuc, DEAD, Helicase_C, HRDC, RQC |
| PNKP                                           |                             | PNK3P                                   |
| Topoisomerase I                                | TOPEUc                      | Topoisom_I_N, Topoisom_I                |
| NUBP1                                          | AAA                         | ParA                                    |
| SMARCAL1                                       | DEXDc, HELICc               | HARP, Helicase_C, SNF2_N                |
| SMRC1                                          | CHROMO, SANT                | Myb_DNA-binding, SWIRM                  |
| BPTF                                           | BROMO,DDT,PHD               | Bromodomain, DDT, FYDLN-acid, PHD       |
| PABP1                                          | PolyA, RRM                  | PABP, RRM_1                             |
| NOLC1                                          | LisH                        | SRP40_C                                 |
| HOXB1                                          | HOX                         | Homebox                                 |
| ZRANB3                                         | HNHc                        | HNH                                     |
| SMYD2                                          | SET                         | Zf-MYND                                 |
| HNRNPU                                         | SAP, SPRY                   | SAP, SPRY                               |

|          |         |                                   |
|----------|---------|-----------------------------------|
| HNRNPA1  | RRM     | RRM_1                             |
| HNRNPCL1 | RRM     | RRM_1                             |
| SNRPB    | Sm      | LSM                               |
| EIF3I    | WD40    | WD40                              |
| EIF4B    | RRM     | RRM_1                             |
| RPL27A   |         | L15                               |
| RPL13    |         | Ribosomal_L13e                    |
| RPL10A   |         | Ribosomal_L1                      |
| RPS3     | KH      | KH_2, Ribosomal_S3_C              |
| RPL6     |         | Ribosomal_L6e,<br>Ribosomal_L6e_N |
| RPS8     |         | Ribosomal_S8e                     |
| NAV2     | AAA, CH | CH                                |
| GNB2L1   | WD40    | WD40                              |

**Supplement Table 4.** Putative DNA-PKcs Target Sites for BCLAF1 Phosphorylation Predicted by GPS 2.1 Software with a High Threshold Setting

| <b>Position</b>  | <b>Code</b> | <b>Peptide</b>              | <b>Score<sup>4</sup></b> |
|------------------|-------------|-----------------------------|--------------------------|
| 15 <sup>1</sup>  | S           | SHSSRSK <u>SR</u> SQSSSR    | 3.571                    |
| 17               | S           | SSRSK <u>SR</u> SQSSSRSR    | 7.429                    |
| 23               | S           | RSQSSSR <u>SR</u> SRSHSR    | 3.048                    |
| 25               | S           | QSSRSR <u>SR</u> SHSRKK     | 3                        |
| 122 <sup>2</sup> | S           | PKRRSVSS <u>QR</u> SRSR     | 4.381                    |
| 144              | S           | RSPRSSS <u>SR</u> SSSPYS    | 3.286                    |
| 151 <sup>3</sup> | S           | SRSSPY <u>S</u> KSPVSKR     | 4.238                    |
| 161              | S           | PVSKRRG <u>S</u> QEKQTKK    | 3.762                    |
| 181              | S           | QEEsplK <u>S</u> KSQEePK    | 3.619                    |
| 183              | S           | ESplK <u>S</u> KSQEePKDT    | 6.048                    |
| 237              | S           | SPIATPP <u>S</u> QSSSCSD    | 4.857                    |
| 259              | S           | HSakNTP <u>S</u> QHSHSIQ    | 7.19                     |
| 494              | T           | RITVKK <u>E</u> TQSPEQVK    | 5.095                    |
| 753              | S           | QDHSR <u>SS</u> SSASPSS     | 3                        |
| 760              | S           | SSSASP <u>S</u> SSPSSREEK   | 2.952                    |
| 763              | S           | ASPSS <u>P</u> SSPSSREEKESK | 5.857                    |
| 769              | S           | SSREEK <u>E</u> SKKEREeE    | 3.714                    |

1. the predicted phosphorylation sites in the RS domain are highlighted in grey,
2. the phosphorylation site in the basic zipper (bZIP) DNA binding domain is underlined,
3. the phosphorylation sites identified by mass spectrometry are highlighted in red,
4. the threshold of cut-off score is at 3.806 in the phosphorylation prediction by using GSP 2.1 software.
